# Supplementary material for: A sky blue thermally activated delayed fluorescence emitter to achieve efficient white light emission through in situ metal complex formation
Source: Royal Society of Chemistry journal article supplement (doi:10.1039/c8tc06041j), 2019-01-01
Supplement: c8tc06041j1.pdf [file c8tc06041j1.pdf]

## Electronic Supplementary Information for:

### A sky blue thermally activated delayed fluorescent emitter to achieve efficient white light emission through in situ metal complex formation

By Yuki Kato, Hisahiro Sasabe\*, Yuya Hayasaka, Yuichiro Watanabe, Hiroki Arai, and Junji Kido\*

Department of Organic Materials Science, Graduate School of Organic Materials Science, Yamagata University, Research Center for Organic Electronics (ROEL), Yamagata University, Frontier Center for Organic Materials (FROM), Yamagata University, Yamagata 992-8510, Japan

E-mail: (h-sasabe@yz.yamagata-u.ac.jp, kid@yz.yamagata-u.ac.jp)

#### General Considerations:

Quantum chemical calculations were performed using the hybrid DFT functional Becke and Hartree-Fock exchange and Lee Yang and Parr correlation (B3LYP) as implemented by the Gaussian 09 program packages. Electrons were described by the Pople's 6-31G(d) and 6-311+G(d,p) basis sets for molecular structure optimization and single-point energy calculations, respectively. <sup>1</sup>H NMR and <sup>13</sup>C NMR spectra were recorded on JEOL 400 (400 MHz) spectrometer. Mass spectrum was obtained using a JEOL JMS-K9 mass spectrometer. DSC was performed using a Perkin-Elmer Diamond DSC Pyris instrument under nitrogen atmosphere at a heating rate of 10 °C min<sup>-1</sup>. TGA was undertaken using a SEIKO EXSTAR 6000 TG/DTA 6200 unit under nitrogen atmosphere at a heating rate of 10 °C min<sup>-1</sup>. UV-vis spectra was measured using a Shimadzu UV-3150 UV-vis-NIR spectrophotometer. Photoluminescence spectra were measured using a FluoroMax-2 (Jobin-Yvon-Spex) luminescence spectrometer. The *I*<sub>p</sub> was determined by a PYS under the vacuum (=10<sup>-3</sup> Pa). Transient PL decay curves and time resolved photoluminescence spectra were measured by using a streak camera (C4334 from Hamamatsu Photonics) at 5 K and 300 K.

#### Device Fabrication and Characterization:

The substrates were cleaned with ultrapurified water and organic solvents, and then dry-cleaned for 30 minutes by exposure to UV-ozone. The organic layers were deposited onto the ITO substrates under the vacuum (=10<sup>-5</sup> Pa), successively. LiF and Al was patterned using a shadow mask with an array of 2 mm × 2mm openings without breaking the vacuum (=10<sup>-5</sup> Pa). The electroluminescent (EL) were taken using an optical multichannel analyzer Hamamatsu Photonics PMA-11. The current density-voltage and luminance-voltage characteristics were measured by using a Keithley source measure unit 2400 and a Minolta CS200 luminance meter, respectively.

## Synthesis

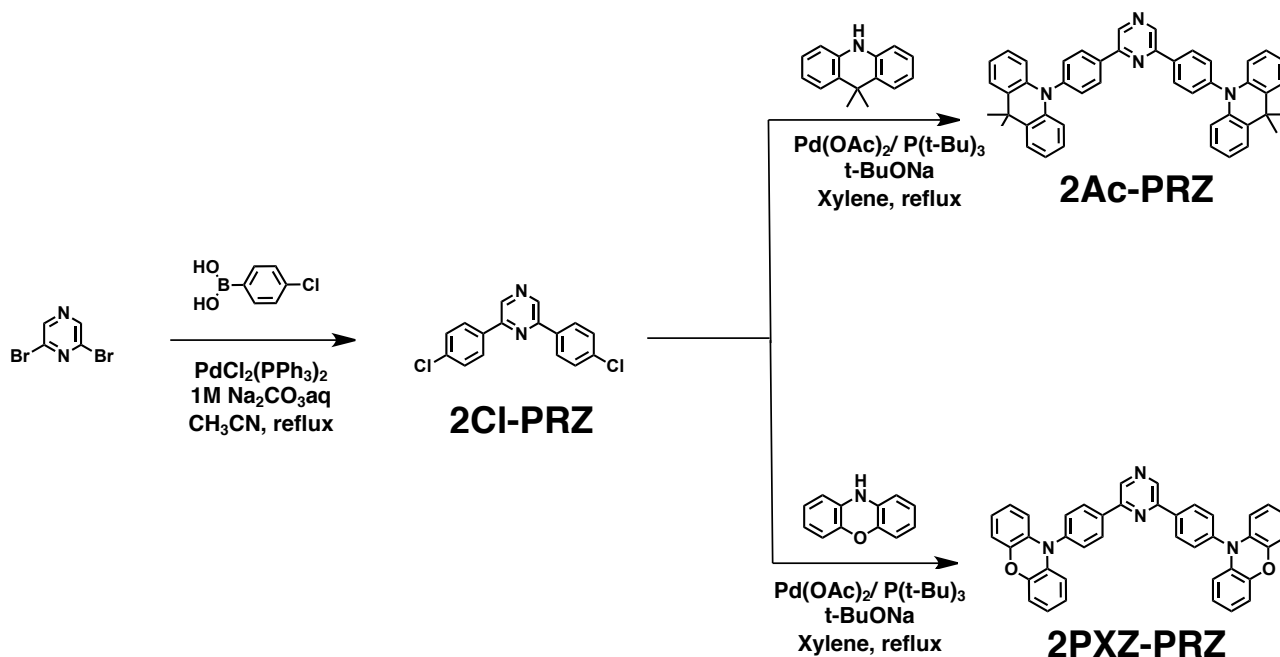

**Scheme S1.** Synthetic routes of **2Ac-PRZ** and **2PXZ-PRZ**.

### Synthesis of 2Cl-PRZ

2,6-Dibromopyrazine (0.95 g, 4.0 mmol), 4-chlorophenylboronic acid (1.25 g, 8.0 mmol), and aqueous  $\text{Na}_2\text{CO}_3$  (1 M, 20 ml) were added to a round bottom flask.  $\text{CH}_3\text{CN}$  (80 ml) was added and nitrogen was bubbled through the mixture for 1.5 hour. Then,  $\text{PdCl}_2(\text{PPh}_3)_2$  (0.14 g, 0.20 mmol) was added and the resultant mixture was stirred for 3 hours at reflux temperature under  $\text{N}_2$  flow. After cooling to room temperature, the precipitate was filtered. The resulting solid was purified by chromatography on silica gel (eluent: toluene) to afford **2Cl-PRZ** (1.02 g, 85 %) as a white solid:  $^1\text{H-NMR}$  (400 MHz,  $\text{DMSO-d}_6$ ):  $\delta$  9.26 (s, 2H), 8.30 (d, 4H,  $J=8.8$  Hz), 7.64 (d, 4H,  $J=8.8$  Hz) ppm; MS:  $m/z = 301[\text{M} + \text{H}]^+$ (ASAP).

### Synthesis of 2Ac-PRZ

9,10-Dihydro-9,9-dimethylacridine (0.63 g, 3.0 mmol), **2Cl-PRZ** (0.45 g, 1.5 mmol), and t-BuONa (0.43 g, 4.5 mmol) were added to a round bottom flask and nitrogen flow for 15 minutes. Xylene (20 ml) was added and nitrogen was bubbled through the mixture for 1 hour. Then,  $\text{Pd}(\text{OAc})_2$  (17 mg, 0.075 mmol) and  $[(\text{t-Bu})_3\text{PH}]\text{BF}_4$  (65 mg, 0.45 mmol) were added and the resultant mixture was stirred for 12 hours at reflux temperature under  $\text{N}_2$  flow. The precipitate was filtered, and washed with brine, dried over anhydrous  $\text{Na}_2\text{SO}_4$ , filtered, and evaporated to dryness. The resulting solid was purified by column chromatography on silica gel to afford **2Ac-PRZ** (0.76 g, 78 %) as a pale yellow solid:  $^1\text{H-NMR}$  (400 MHz,  $\text{DMSO-d}_6$ ):  $\delta$  9.42 (s, 2H), 8.63 (d, 4H,  $J=8.0$  Hz), 7.56 (dd, 8H,  $J=8.4, 7.6$  Hz),

7.02-6.91 (m, 8H), 6.26 (d, 4H,  $J=8.0$  Hz), 1.65 (s, 12H) ppm;  $^{13}\text{C}$ -NMR (100 MHz,  $\text{CDCl}_3$ ) :  $\delta$  = 151.02, 143.06, 140.66, 140.41, 136.23, 132.09, 130.12, 129.64, 126.42, 125.35, 120.78, 114.04, 36.00, 31.29 ppm; MS:  $m/z$  = 647  $[\text{M} + \text{H}]^+$ (ASAP).; Anal calcd for  $\text{C}_{46}\text{H}_{38}\text{N}_4$ : C, 85.42; H, 5.92; N, 8.66 %. Found: C, 85.46; H, 5.97; N, 8.64 %.

### Synthesis of **2PXZ-PRZ**

Phenoxazine (0.39 g, 2.1 mmol), **2Cl-PRZ** (0.30 g, 1.0 mmol), and t-BuONa (0.29 g, 3.0 mmol) were added to a round bottom flask and nitrogen flow for 15 minutes. Xylene (15 ml) was added and nitrogen was bubbled through the mixture for an hour. Then,  $\text{Pd}(\text{OAc})_2$  (11 mg, 0.05 mmol) and  $[(^t\text{Bu})_3\text{PH}]\text{BF}_4$  (44 mg, 0.15 mmol) were added and the resultant mixture was stirred for 24 hours at reflux temperature under  $\text{N}_2$  flow. The precipitate was filtered, and washed with brine, dried over anhydrous  $\text{Na}_2\text{SO}_4$ , filtered, and evaporated to dryness. The resulting solid was purified by column chromatography on silica gel to afford **2PXZ-PRZ** (0.35 g, 60 %) as a pale yellow solid:  $^1\text{H}$ -NMR (400 MHz,  $\text{DMSO-d}_6$ ) :  $\delta$  9.40 (s, 2H), 8.59 (d, 4H,  $J=8.4$  Hz), 7.65 (d, 4H,  $J=8.4$  Hz), 6.79-6.67 (m, 12H), 5.99-5.97 (m, 4H) ppm;  $^{13}\text{C}$ -NMR (100 MHz,  $\text{CDCl}_3$ ) :  $\delta$  = 150.85, 143.95, 140.77, 140.43, 136.44, 134.05, 131.61, 129.79, 123.29, 121.60, 115.61, 113.26 ppm; MS:  $m/z$  = 594  $[\text{M}]^+$ (ASAP); Anal calcd for  $\text{C}_{40}\text{H}_{26}\text{N}_4\text{O}_2$ : C, 80.79; H, 4.41; N, 9.42 %. Found: C, 80.63; H, 4.52; N, 9.37 %.

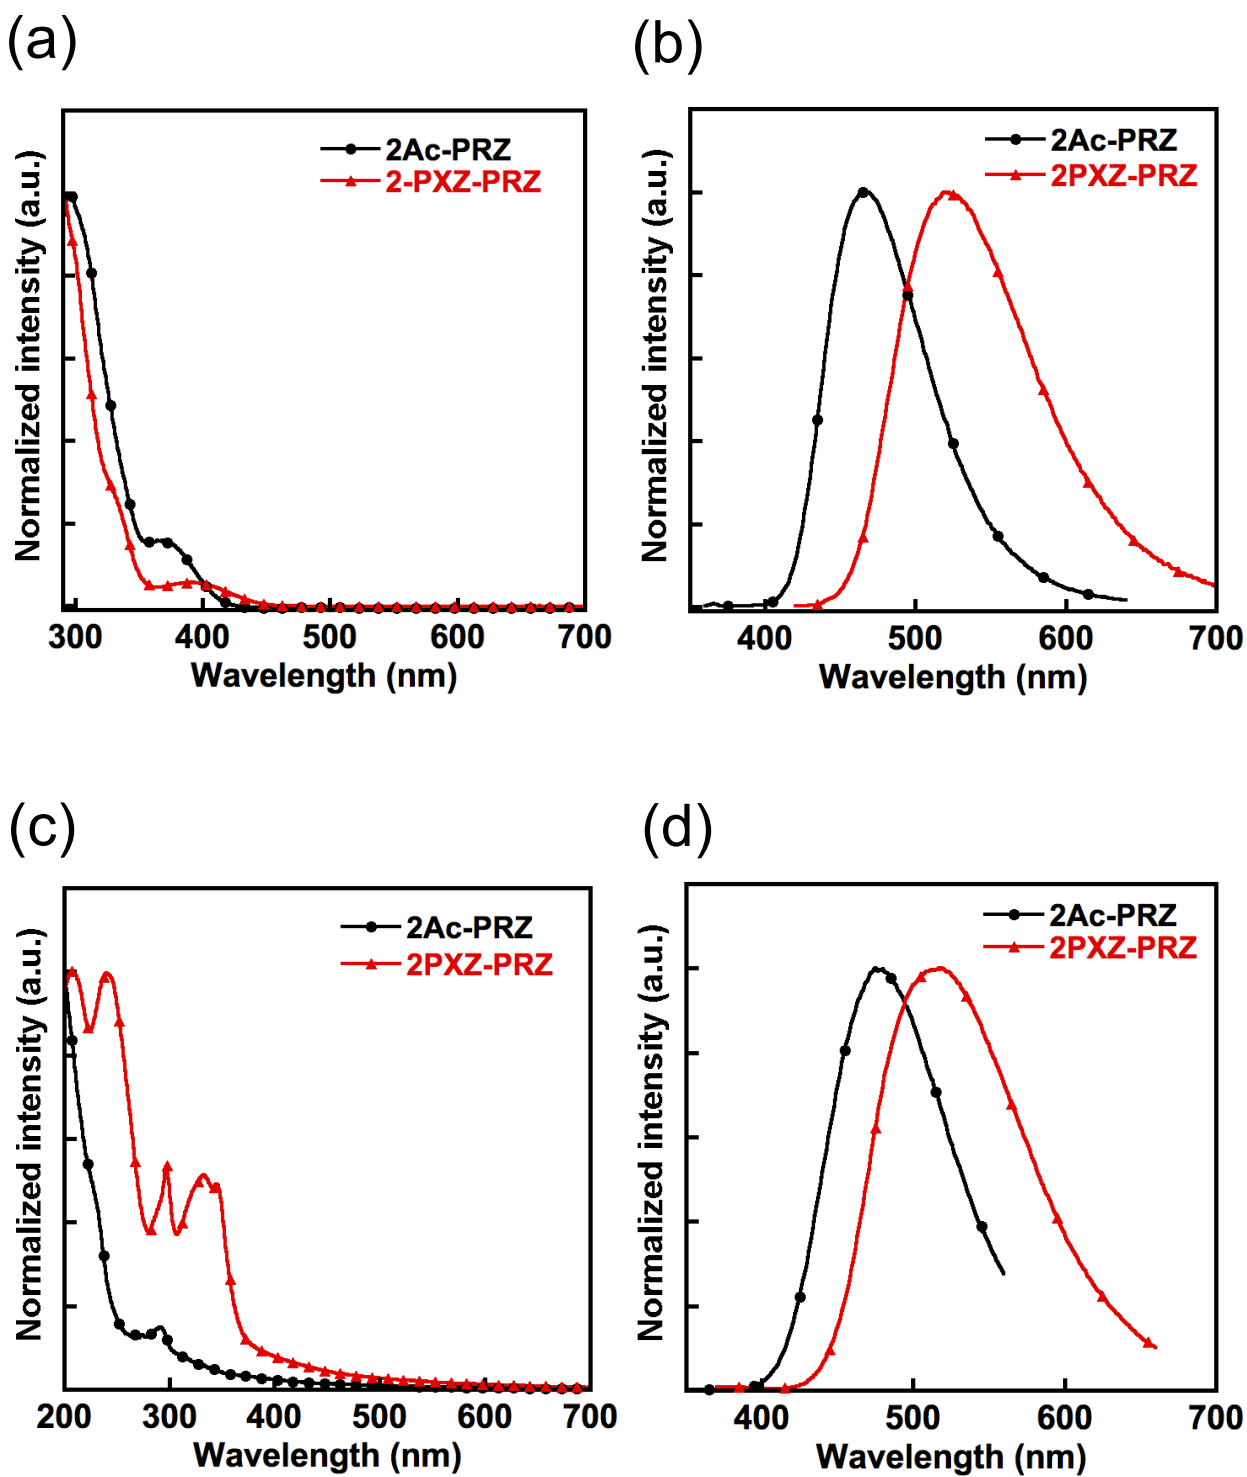

**Figure S1.** (a) UV-vis absorption, and (b) PL spectra of **PRZ** derivatives in toluene ( $1.0 \times 10^{-5}$  M). (c) UV-vis absorption, and (d) PL spectra of 10 wt% **2Ac-PRZ**-doped DPEPO film, (d) 10 wt% **2PXZ-PRZ**-doped CBP film.

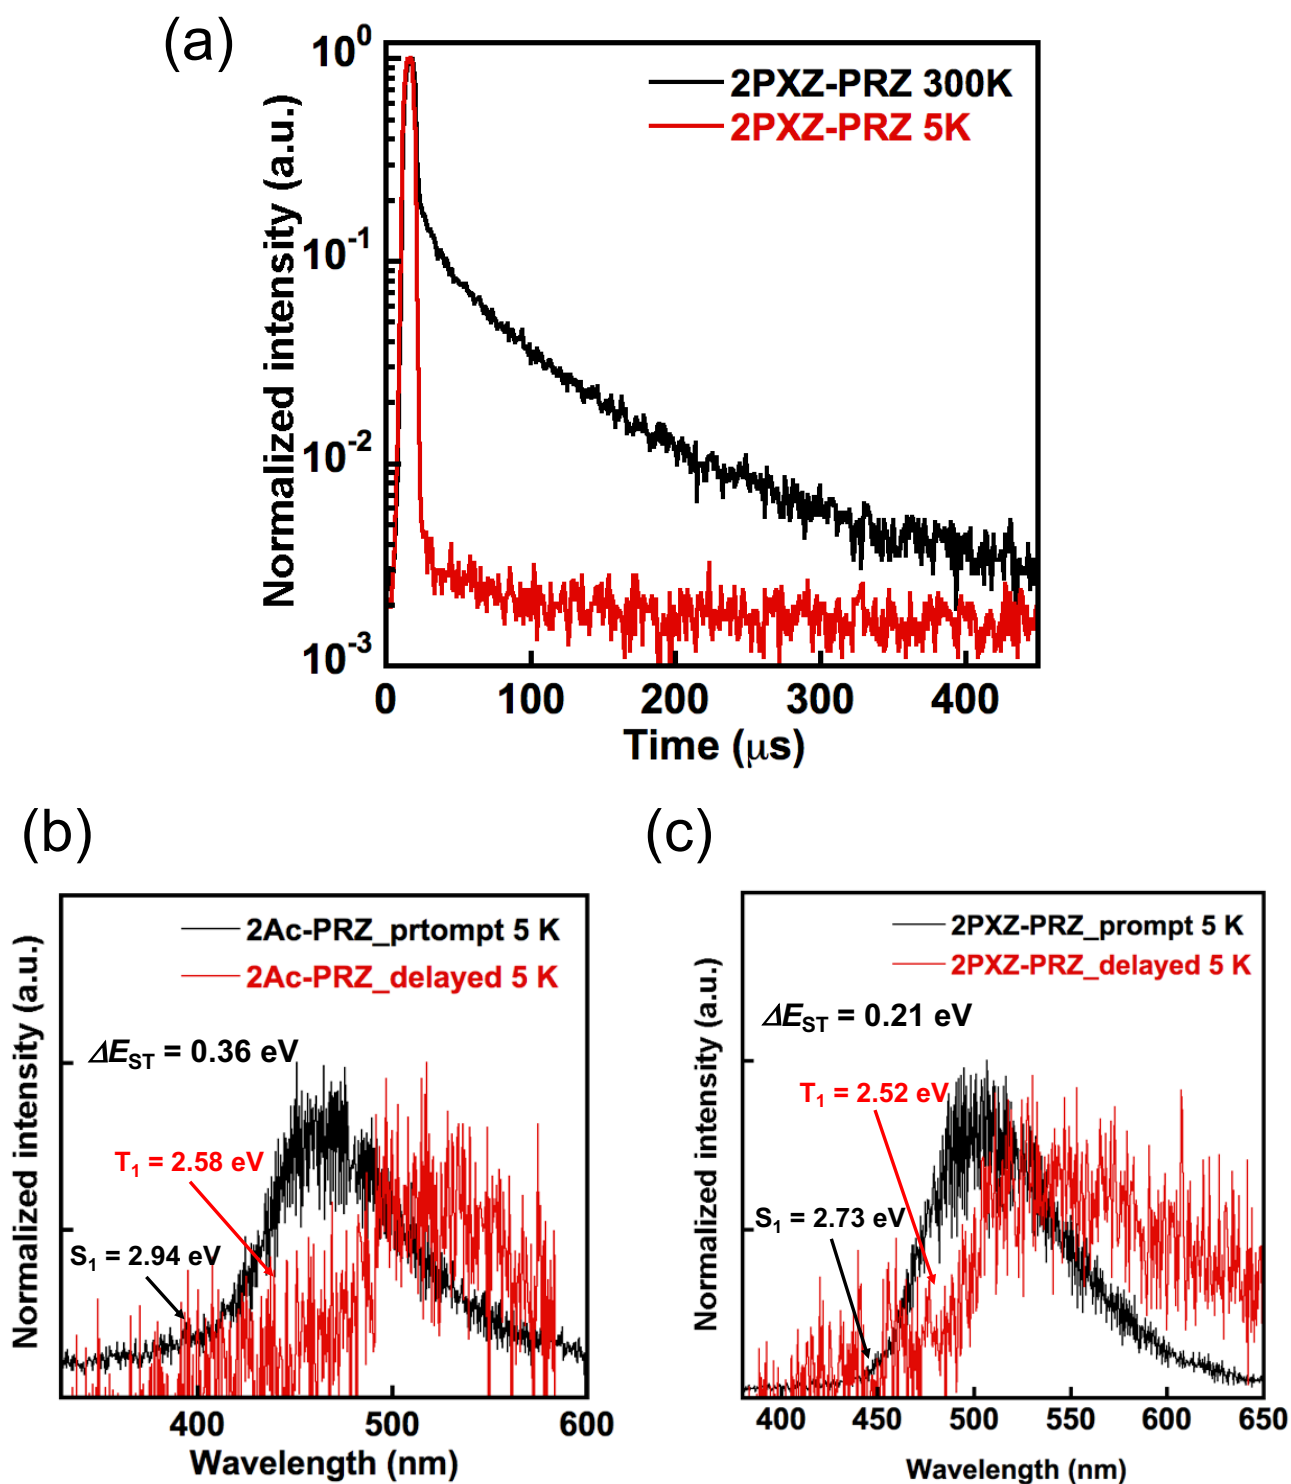

**Figure S2.** (a) Transient PL decay curves of 2PXZ-PRZ-doped CBP film at 5 K and 300 K, and time resolved photoluminescence spectra of the (b) 2Ac-PRZ-doped DPEPO and (c) 2PXZ-PRZ-doped CBP film.

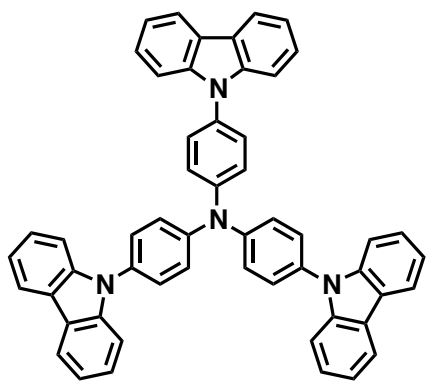

**TCTA**

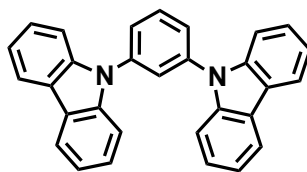

**mCP**

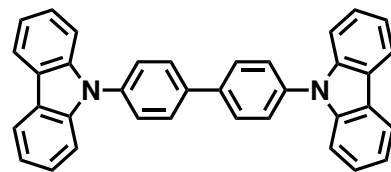

**CBP**

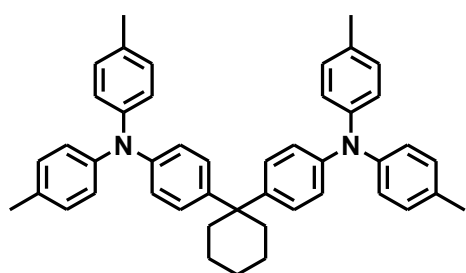

**TAPC**

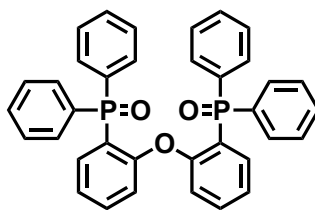

**DPEPO**

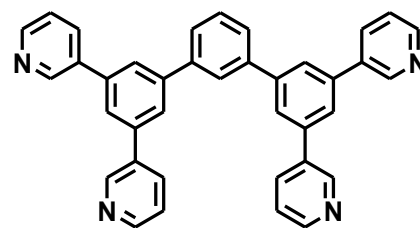

**B3PyPB**

**Figure S3.** Chemical structures of materials used in this work.

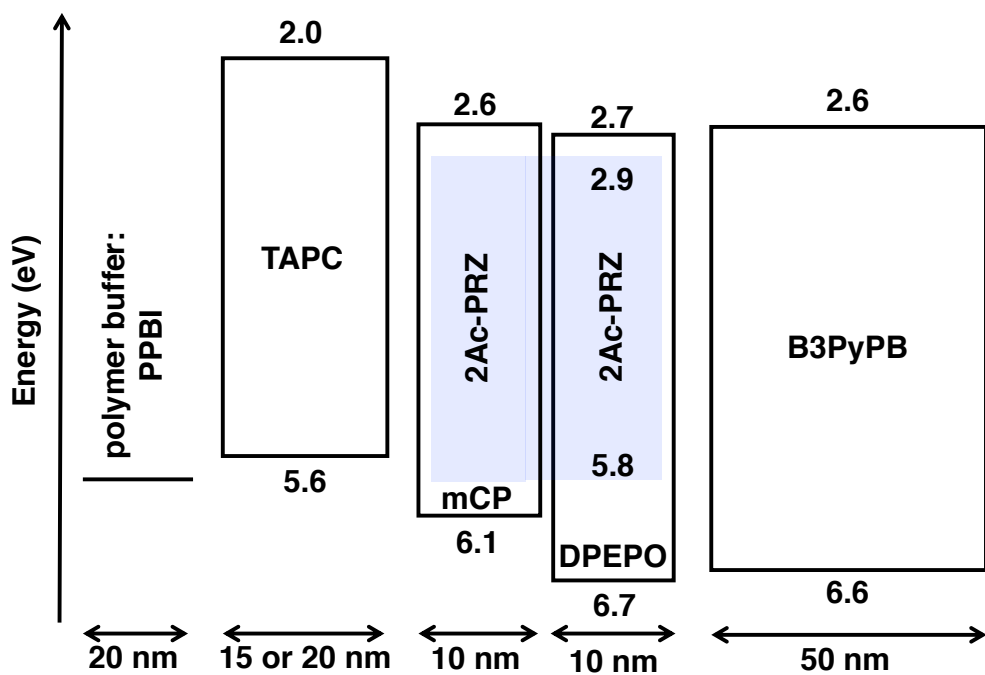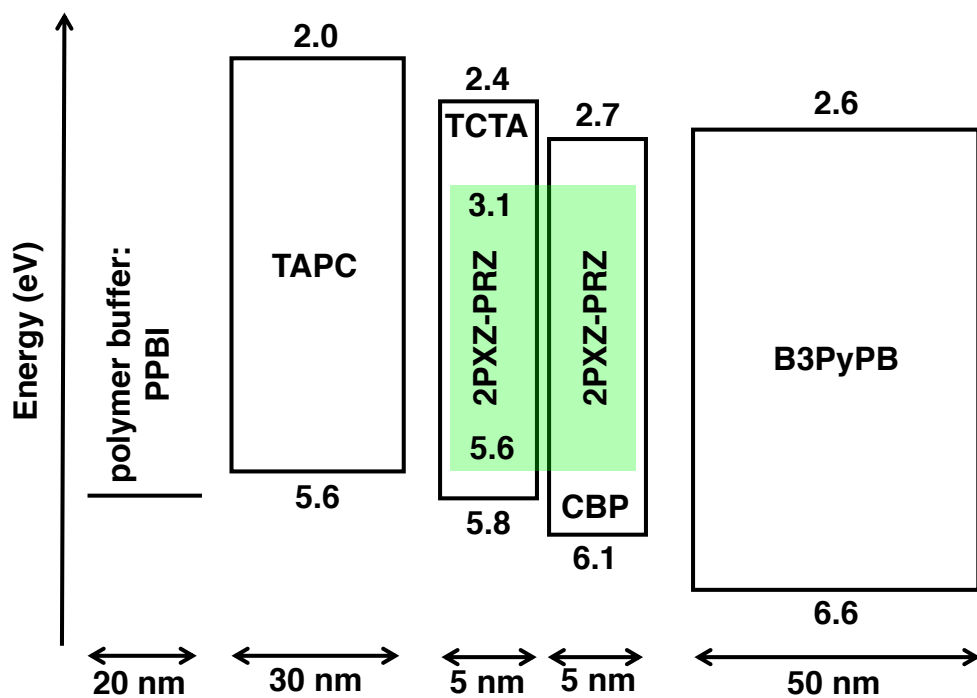

Figure S4. Energy diagram

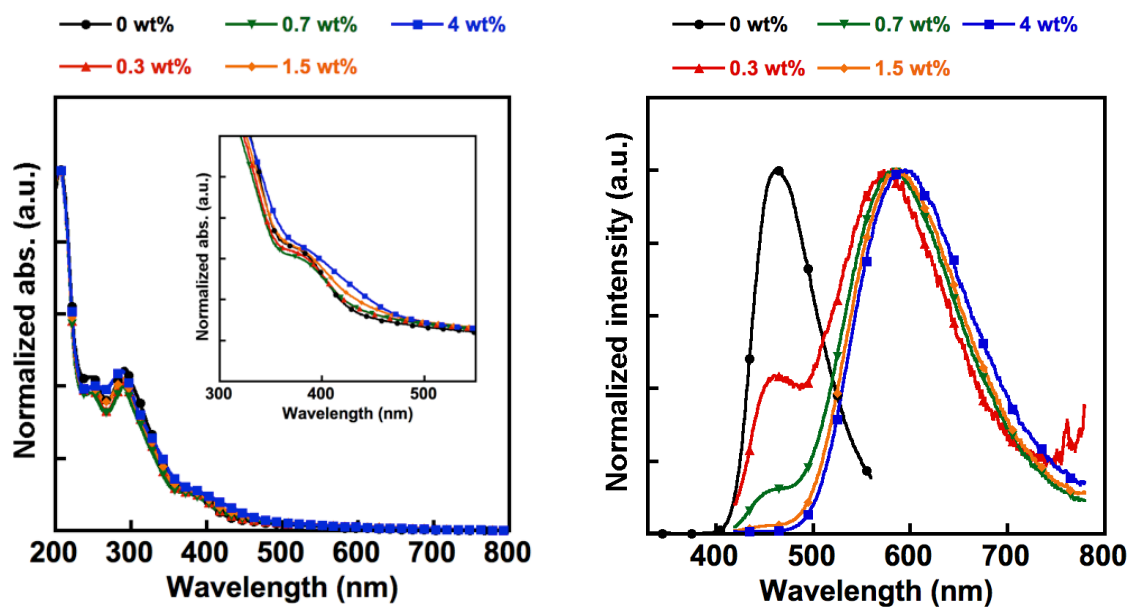

**Figure S5** UV/vis absorption and PL spectra of neat film of **2Ac-PRZ** and co-deposited films with difference doping ratio.

**Table 1.** Photophysical properties

| Compound                   | $\lambda_{\text{PL}}$<br>(nm) | $\eta_{\text{PL}}$<br>(%) |
|----------------------------|-------------------------------|---------------------------|
| <b>2Ac-PRZ</b>             | 463                           | 17.6                      |
| <b>0.3wt% CuI: 2Ac-PRZ</b> | 463, 581                      | 35.9                      |
| <b>0.7wt% CuI: 2Ac-PRZ</b> | 463, 589                      | 36.4                      |
| <b>1.5wt% CuI: 2Ac-PRZ</b> | 586                           | 26.9                      |
| <b>4wt% CuI: 2Ac-PRZ</b>   | 595                           | 13.8                      |



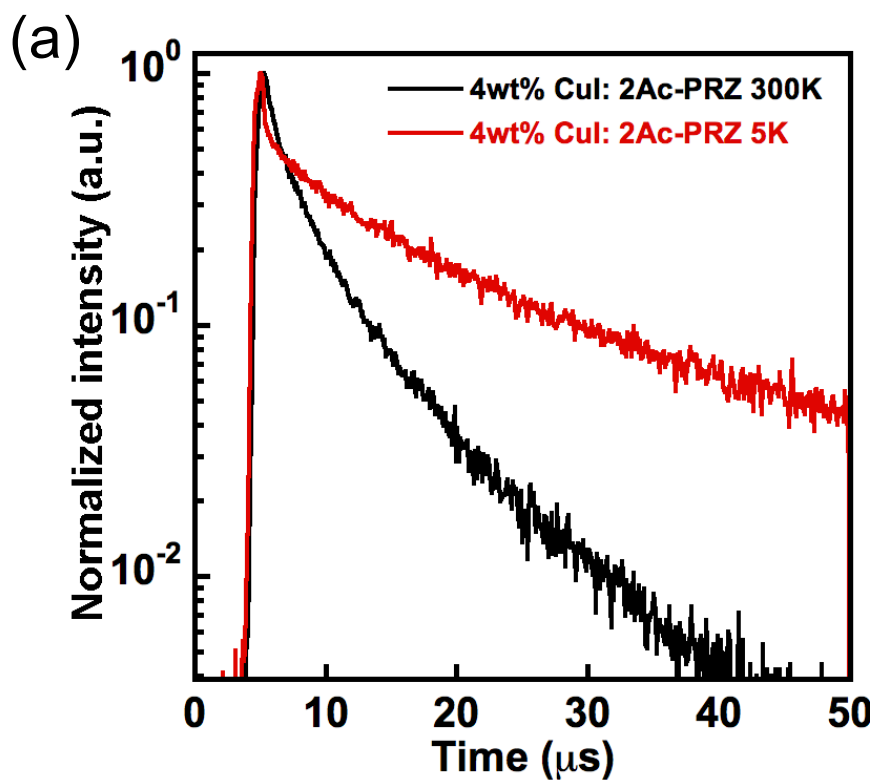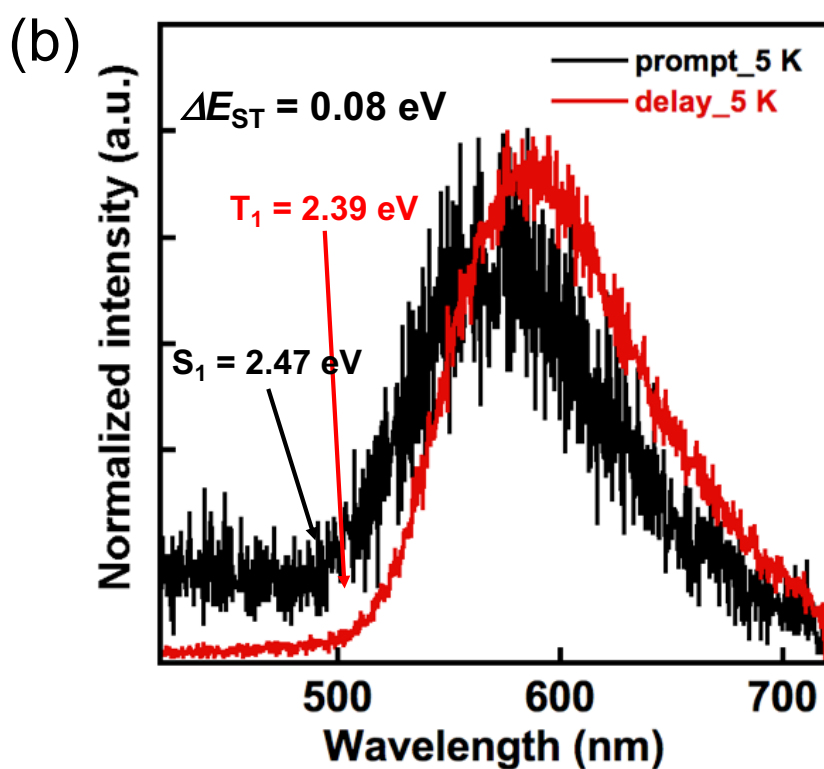

**Figure S6.** (a) Transient PL decay curves at 5 K and 300 K, and (b) time resolved photoluminescence spectra of 4wt% CuI-doped 2Ac-PRZ film.

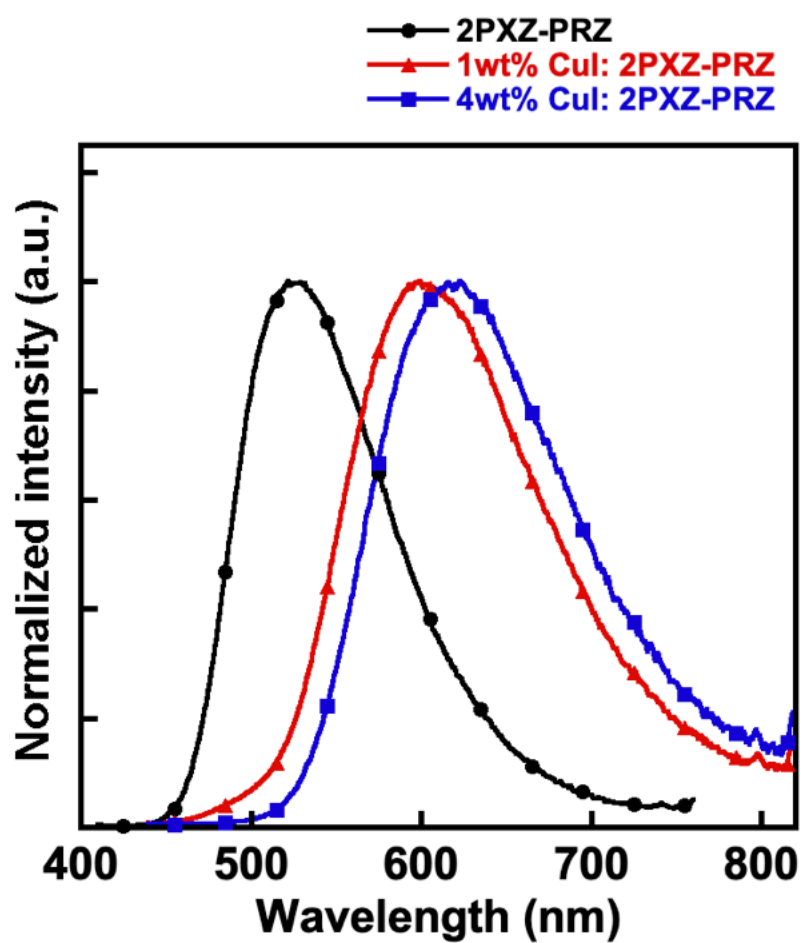

Figure S7 PL spectra of neat film of 2Ac-PRZ and co-deposited films with difference doping ratio.

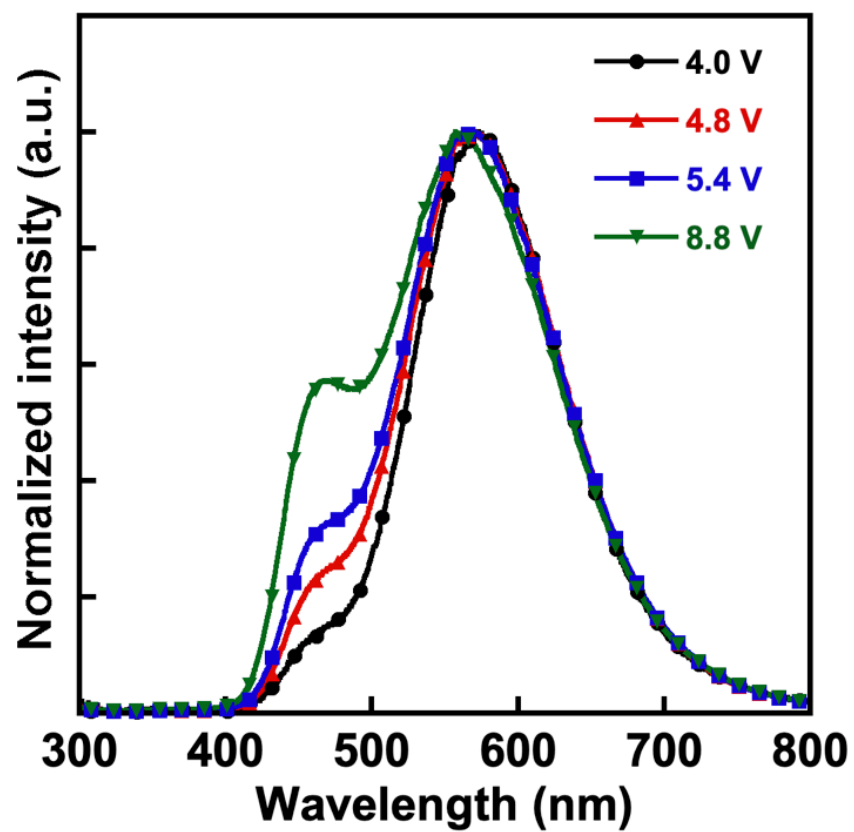

Figure S8 EL spectra of WOLED recorded at different voltages.
